# Supplementary material for: Effects of Age on Acute Appetite-Related Responses to Whey-Protein Drinks, Including Energy Intake, Gastric Emptying, Blood Glucose, and Plasma Gut Hormone Concentrations—A Randomized Controlled Trial
Source: PubMed Central journal article supplement (PMC7231005; doi:10.3390/nu12041008), 2020-04-06

## CONSORT 2010 Flow Diagram

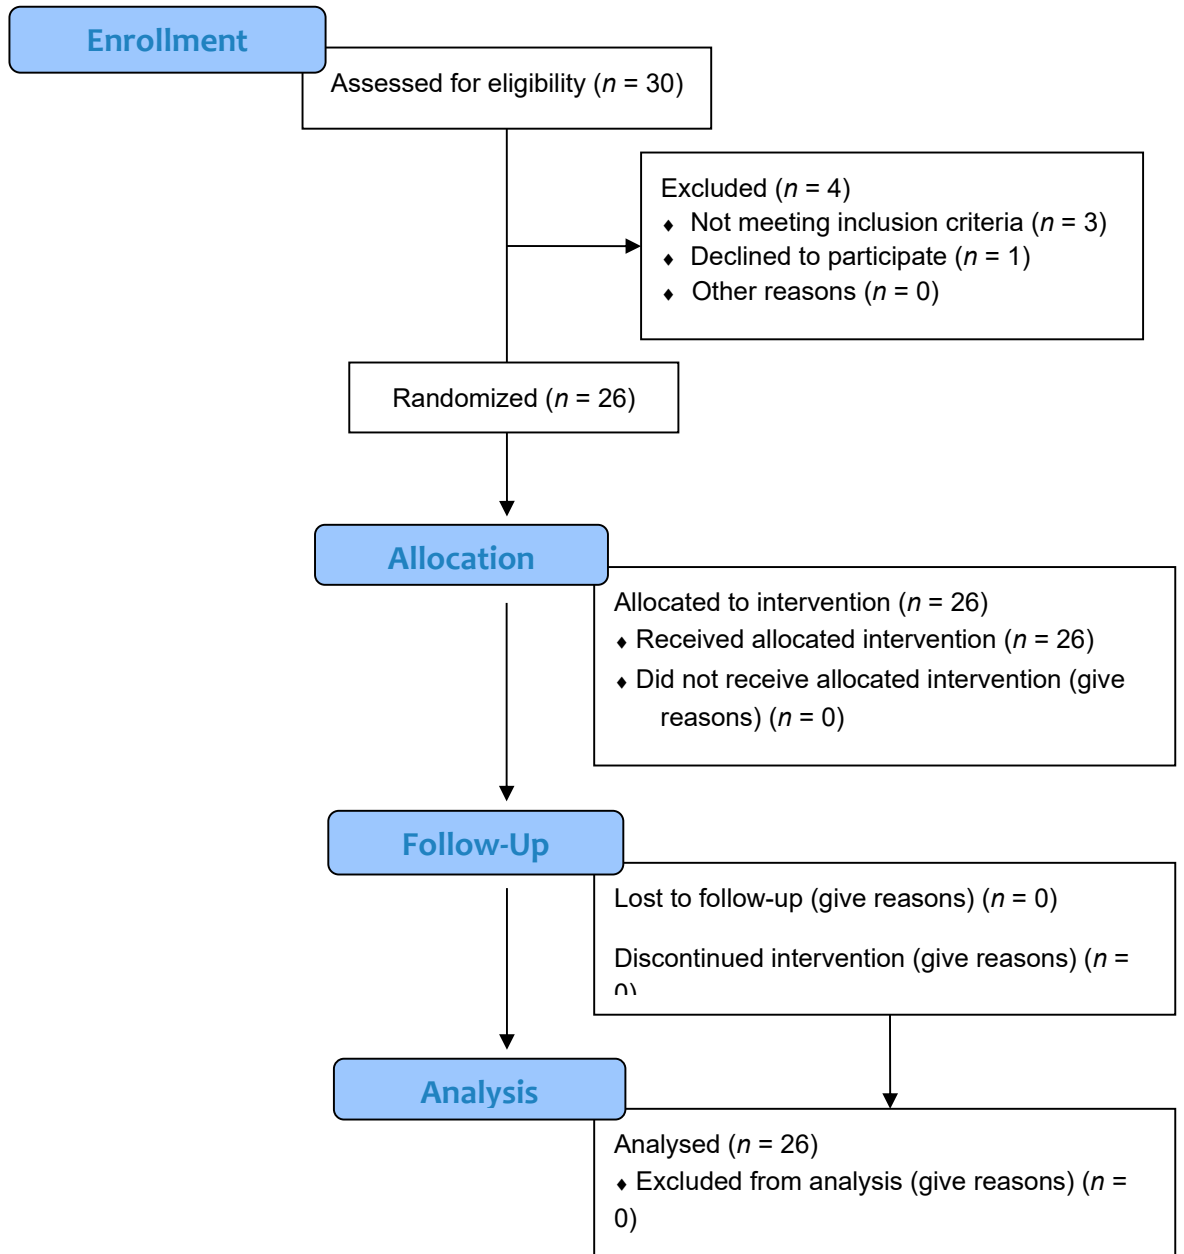

Supplement: nutrients-12-01008-s001.pdf [file nutrients-12-01008-s001.pdf]
